# Supplementary material for: Potent cyclometallated Pd(ii) antitumor complexes bearing α-amino acids: synthesis, structural characterization, DNA/BSA binding, cytotoxicity and molecular dynamics simulation
Source: Royal Society of Chemistry journal article supplement (doi:10.1039/d0dt02304c), 2020-01-01
Supplement: d0dt02304c1.pdf [file d0dt02304c1.pdf]

## Electronic Supplementary Information

### Potent cyclometalated Pd (II) antitumor complexes bearing $\alpha$ -amino acids: Synthesis, structural characterization, DNA/BSA binding, cytotoxicity and molecular dynamics simulation

*Sedigheh Abedanzadeh<sup>a,b,c</sup>, Kazem Karami<sup>a\*</sup>, Mostafa Rahimi<sup>a</sup>, Masoud Edalati<sup>a</sup>, Mozghan Abedanzadeh<sup>d</sup>, Ali mohammad tamaddon<sup>d</sup>, Maryam Dehdashti Jahromi<sup>a</sup>, Zahra Amirghofran<sup>e</sup>, Janusz Lipkowski<sup>f</sup>, and Krzysztof Lyczko<sup>g</sup>*

<sup>a</sup>Department of Chemistry, Isfahan University of Technology, Isfahan, 84156/83111, Iran

<sup>b</sup>Institute of Biochemistry and Biophysics (IBB), University of Tehran, Tehran, Iran

<sup>c</sup>Faculty of Chemistry, Kharazmi University, Tehran 15719-14911, Iran

<sup>d</sup>Center for Nanotechnology in Drug Delivery, Shiraz University of Medical Sciences, Shiraz, Iran

<sup>e</sup>Department of Immunology, School of Medicine, Shiraz University of Medical Sciences, Shiraz, Iran

<sup>f</sup>Cardinal Stefan Wyszyński University in Warsaw, Wycickiego 1/3, 01-238, Warsaw, Poland

<sup>g</sup>Institute of Nuclear Chemistry and Technology, Dorodna 16, 03-19 Warszawa, Poland

---

\* Corresponding author: Kazem Karami; Email: karami@cc.iut.ac.ir

| Contents                                                                                                                                                                                                                          | Page |
|-----------------------------------------------------------------------------------------------------------------------------------------------------------------------------------------------------------------------------------|------|
| <b>Figure S1.</b> FT-IR spectrum of ylide ligand.                                                                                                                                                                                 | 3    |
| <b>Figure S2.</b> $^1\text{H}$ NMR spectrum of ylide ligand in $\text{CDCl}_3$ at room temperature.                                                                                                                               | 4    |
| <b>Figure S3.</b> $^{31}\text{P}\{^1\text{H}\}$ NMR spectrum of ylide ligand in $\text{CDCl}_3$ at room temperature.                                                                                                              | 5    |
| <b>Figure S4.</b> FT-IR spectrum of dinuclear ylide palladacycle                                                                                                                                                                  | 6    |
| <b>Figure S5.</b> FT-IR spectrum of <b>Pd-F</b>                                                                                                                                                                                   | 7    |
| <b>Figure S6.</b> $^1\text{H}$ NMR spectrum of <b>Pd-F</b> in $\text{CDCl}_3$ at room temperature.                                                                                                                                | 8    |
| <b>Figure S7.</b> FT-IR spectrum of <b>Pd-V</b>                                                                                                                                                                                   | 9    |
| <b>Figure S8.</b> $^1\text{H}$ NMR spectrum of <b>Pd-V</b> in $\text{CDCl}_3$ at room temperature.                                                                                                                                | 10   |
| <b>Figure S9.</b> FT-IR spectrum of <b>Pd-L</b>                                                                                                                                                                                   | 11   |
| <b>Figure S10.</b> $^1\text{H}$ NMR spectrum of <b>Pd-L</b> in $\text{CDCl}_3$ at room temperature.                                                                                                                               | 12   |
| <b>Figure S11.</b> $^{13}\text{C}\{^1\text{H}\}$ spectrum of <b>Pd-L</b> in $\text{CDCl}_3$ at room temperature.                                                                                                                  | 13   |
| <b>Figure S12.</b> $^{31}\text{P}\{^1\text{H}\}$ spectrum (expansion) of <b>Pd-L</b> in $\text{CDCl}_3$ at room temperature.                                                                                                      | 14   |
| <b>Figure S13.</b> FT-IR spectrum of <b>Pd-I</b>                                                                                                                                                                                  | 15   |
| <b>Figure S14.</b> $^1\text{H}$ NMR spectrum of <b>Pd-I</b> in $\text{CDCl}_3$ at room temperature.                                                                                                                               | 16   |
| <b>Figure S15.</b> $^{31}\text{P}\{^1\text{H}\}$ NMR spectrum (expansion) of <b>Pd-I</b> in $\text{CDCl}_3$ at room temperature.                                                                                                  | 17   |
| <b>Figure S16.</b> FT-IR spectrum of <b>Pd-A</b>                                                                                                                                                                                  | 18   |
| <b>Figure S17.</b> $^1\text{H}$ NMR spectrum of <b>Pd-A</b> in $\text{CDCl}_3$ at room temperature.                                                                                                                               | 19   |
| <b>Figure S18.</b> $^{13}\text{C}\{^1\text{H}\}$ NMR spectrum of <b>Pd-A</b> in $\text{CDCl}_3$ at room temperature.                                                                                                              | 20   |
| <b>Figure S19.</b> $^{31}\text{P}\{^1\text{H}\}$ NMR spectrum of <b>Pd-A</b> in $\text{CDCl}_3$ at room temperature.                                                                                                              | 21   |
| <b>Figure S20.</b> UV absorption spectra of $C(\text{BSA})=2\times 10^{-6}$ M in the absence and presence of <b>Pd-F</b> .<br>$C(\text{complex})=0.6\times 10^{-6}$ M in 5 mM Tris-HCl with 50 Mm NaCl.                           | 22   |
| <b>Figure S21.</b> Morphological evaluation of <b>Pd-F</b> treated normal HUBEC cell, (0: Control, 1: 5 $\mu\text{g/ml}$ , 2: 10 $\mu\text{g/ml}$ , 3: 15 $\mu\text{g/ml}$ , 4: 25 $\mu\text{g/ml}$ and 5: 50 $\mu\text{g/ml}$ ). | 23   |

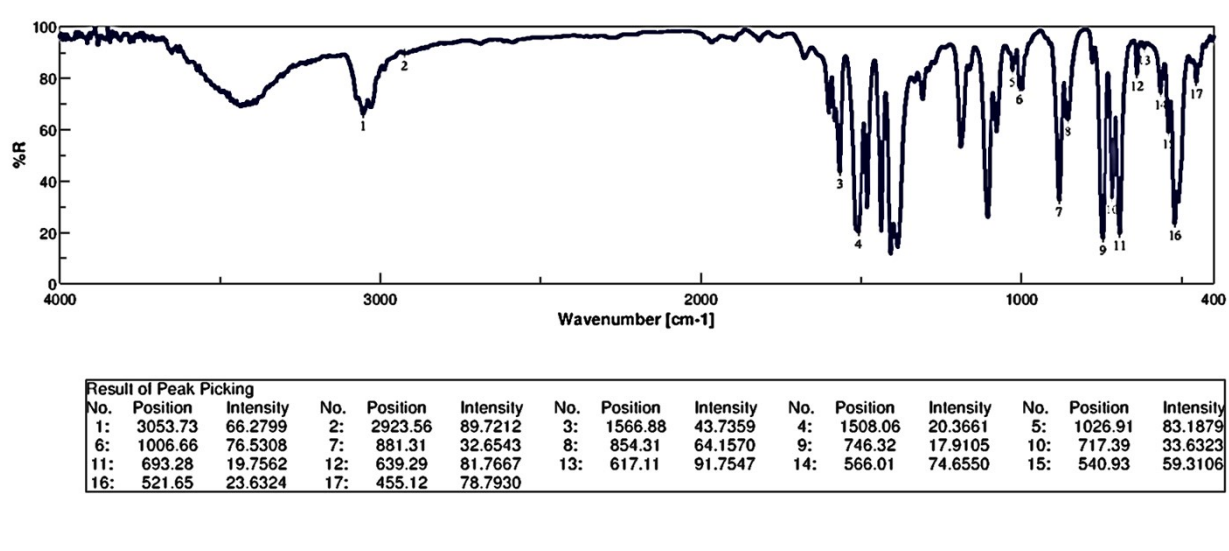

**Figure S1.** FT-IR spectrum of ylide ligand.

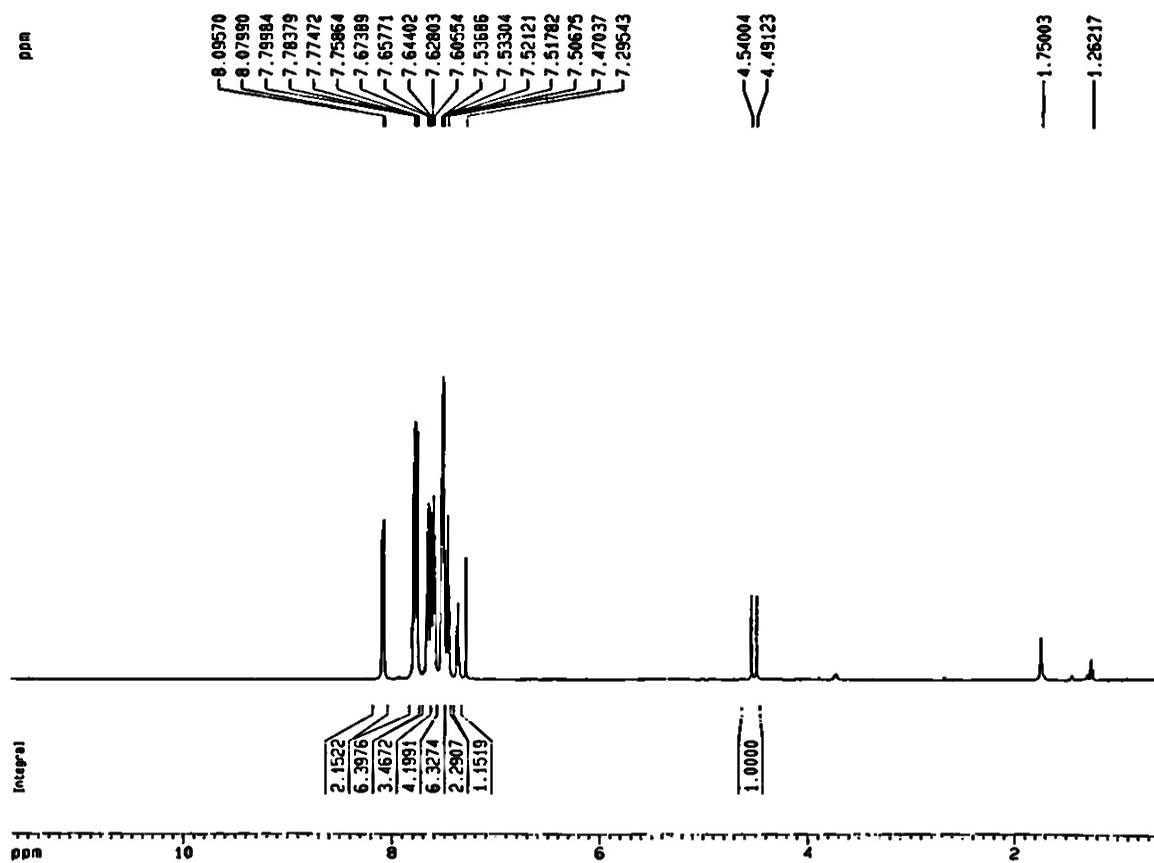

**Figure S2.**  $^1\text{H}$  NMR spectrum of ylide ligand in  $\text{CDCl}_3$  at room temperature.

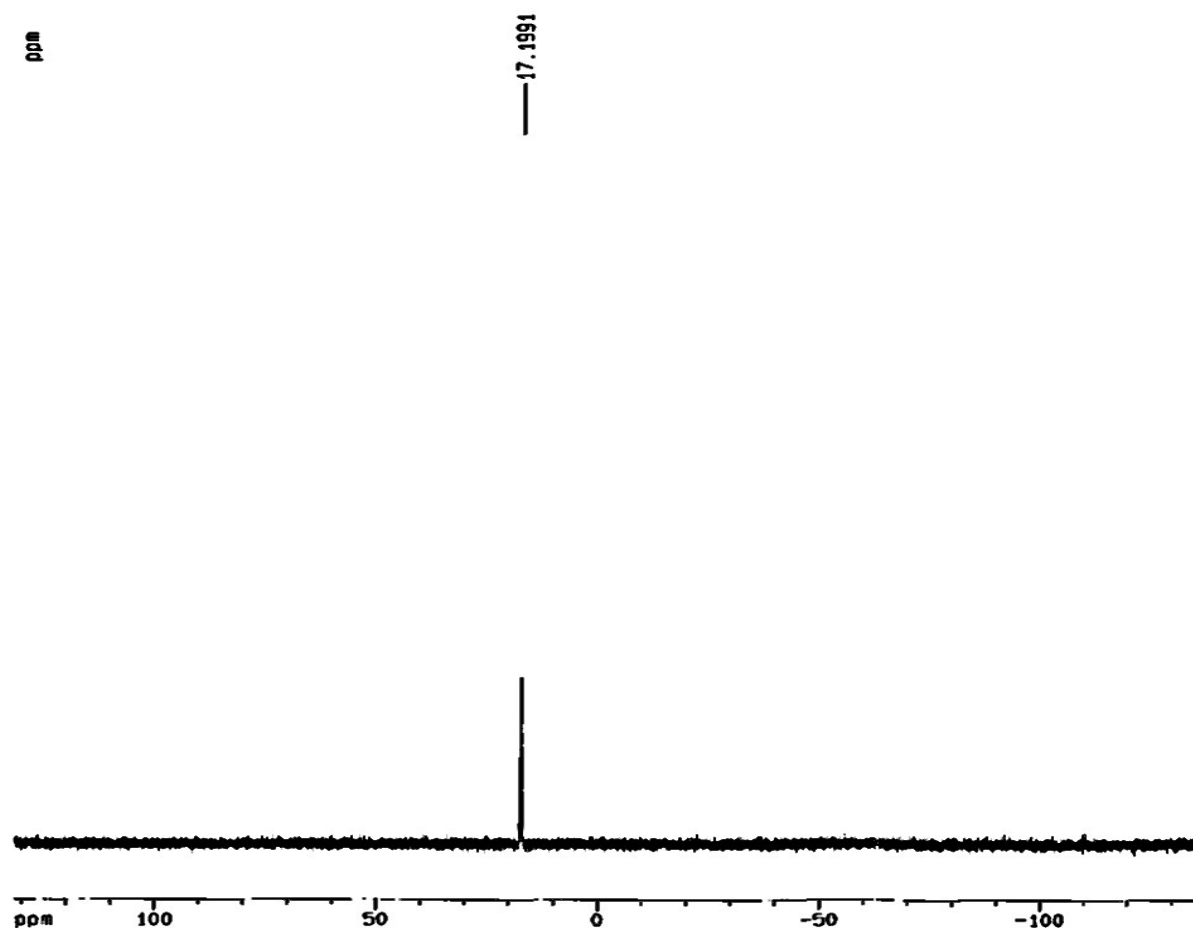

**Figure S3.**  $^{31}\text{P}\{^1\text{H}\}$  NMR spectrum of ylide ligand in  $\text{CDCl}_3$  at room temperature.

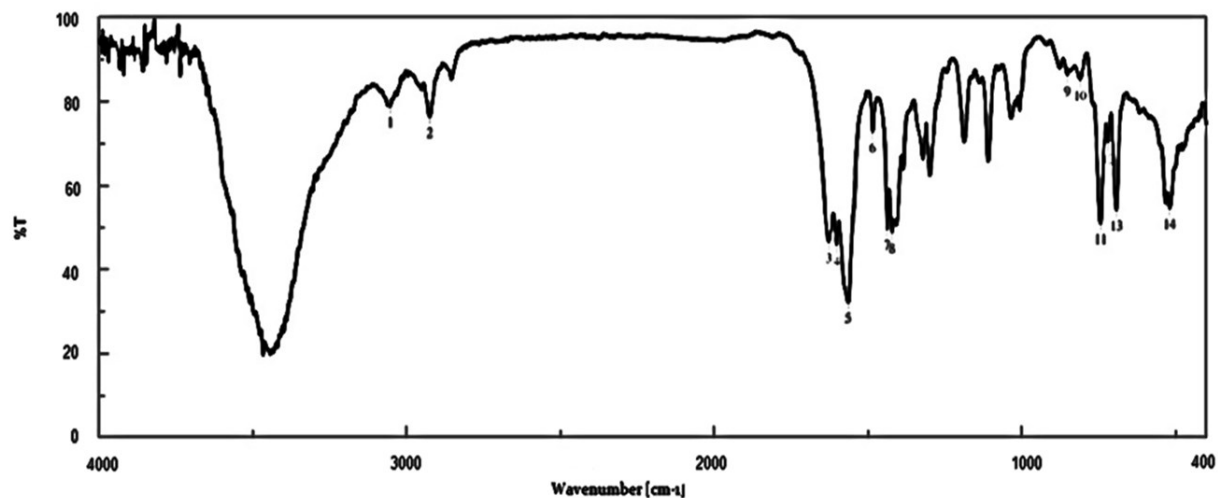

| Result of Peak Picking |          |           |     |          |           |     |          |           |     |          |           |
|------------------------|----------|-----------|-----|----------|-----------|-----|----------|-----------|-----|----------|-----------|
| No.                    | Position | Intensity | No. | Position | Intensity | No. | Position | Intensity | No. | Position | Intensity |
| 1:                     | 3052.76  | 78.5240   | 2:  | 2924.52  | 75.3023   | 3:  | 1626.66  | 43.3499   | 4:  | 1601.59  | 42.0132   |
| 5:                     | 1563.99  | 33.2071   | 6:  | 1483.96  | 70.5048   | 7:  | 1436.71  | 47.8768   | 8:  | 1421.28  | 47.5345   |
| 9:                     | 851.42   | 84.2311   | 10: | 809.96   | 82.6911   | 11: | 743.42   | 46.6169   | 12: | 719.32   | 68.1446   |
| 13:                    | 692.32   | 50.2191   | 14: | 518.76   | 51.3982   |     |          |           |     |          |           |

**Figure S4.** FT-IR spectrum of dinuclear ylide palladacycle

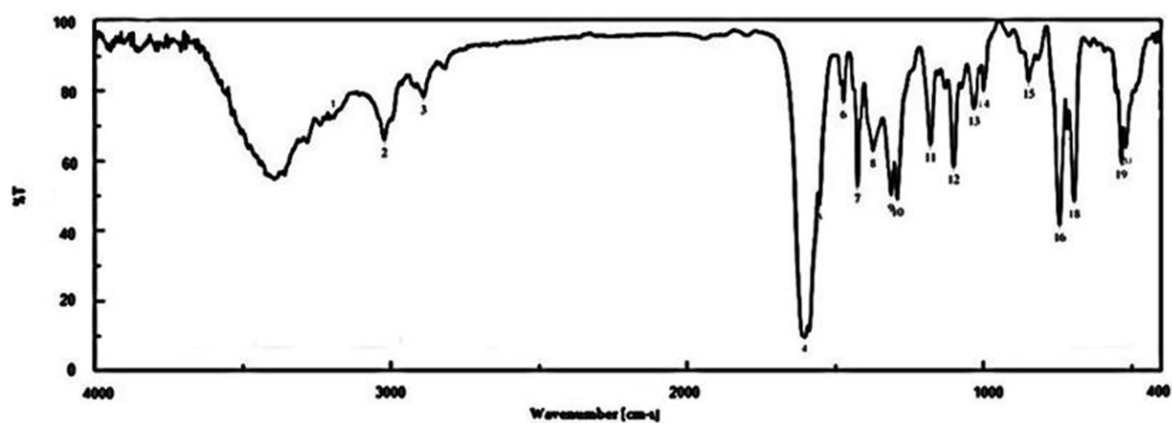

| No. | Position | Intensity |
|-----|----------|-----------|-----|----------|-----------|-----|----------|-----------|-----|----------|-----------|
| 1:  | 3232.11  | 73.1965   | 2:  | 3057.58  | 65.5504   | 3:  | 2923.56  | 77.6717   | 4:  | 1618.96  | 10.3999   |
| 5:  | 1566.88  | 44.6860   | 6:  | 1484.92  | 74.7020   | 7:  | 1436.71  | 52.7064   | 8:  | 1383.68  | 61.2251   |
| 9:  | 1321.96  | 49.7196   | 10: | 1300.75  | 47.8549   | 11: | 1186.97  | 62.5425   | 12: | 1107.90  | 60.7642   |
| 13: | 1038.48  | 72.2283   | 14: | 1005.70  | 79.9275   | 15: | 851.42   | 82.0512   | 16: | 745.35   | 42.4436   |
| 17: | 719.32   | 67.7553   | 18: | 696.21   | 47.4153   | 19: | 534.19   | 61.9037   | 20: | 518.76   | 63.7632   |

**Figure S5.** FT-IR spectrum of **Pd-F**

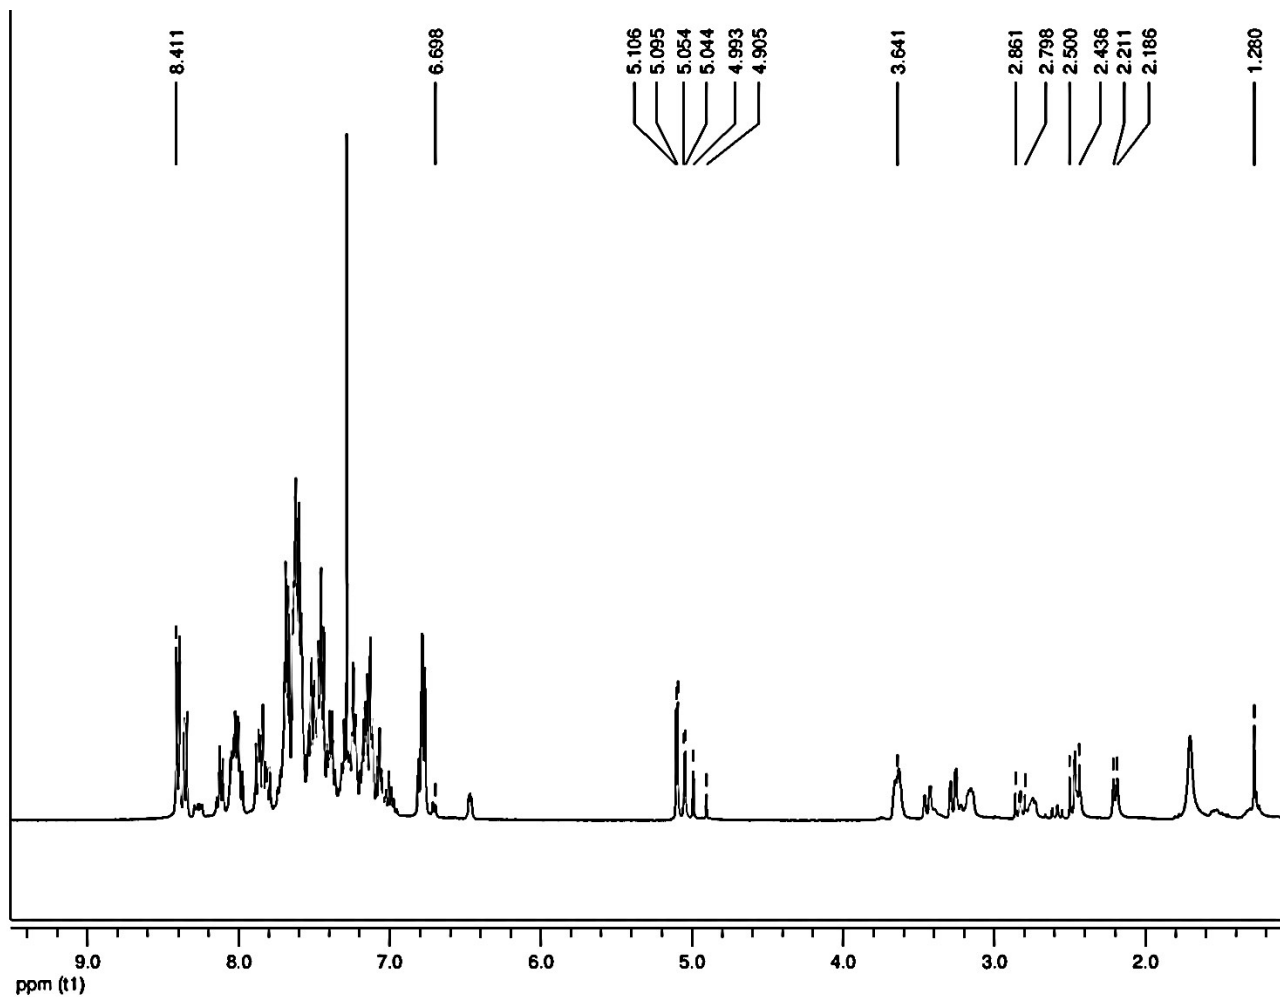

**Figure S6.**  $^1\text{H}$  NMR spectrum of **Pd-F** in  $\text{CDCl}_3$  at room temperature.



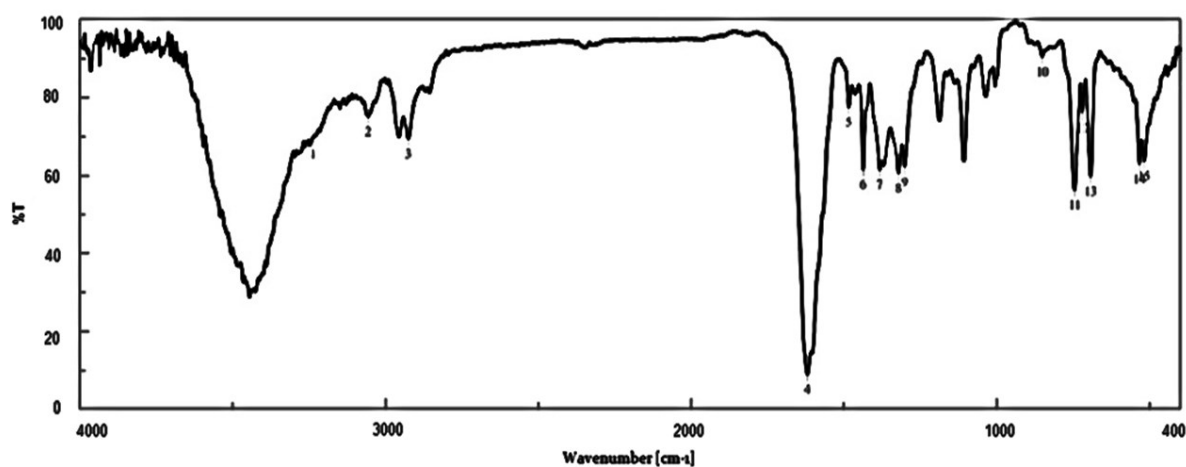

| Result of Peak Picking |          |           |     |          |           |     |          |           |     |          |           |
|------------------------|----------|-----------|-----|----------|-----------|-----|----------|-----------|-----|----------|-----------|
| No.                    | Position | Intensity | No. | Position | Intensity | No. | Position | Intensity | No. | Position | Intensity |
| 1:                     | 3236.93  | 68.8397   | 2:  | 3056.62  | 75.6448   | 3:  | 2925.48  | 70.8178   | 4:  | 1619.91  | 8.5749    |
| 5:                     | 1483.96  | 78.8414   | 6:  | 1436.71  | 60.8866   | 7:  | 1383.68  | 61.8124   | 8:  | 1321.96  | 60.3890   |
| 9:                     | 1300.75  | 63.2098   | 10: | 851.42   | 90.3352   | 11: | 745.35   | 58.2539   | 12: | 719.32   | 76.0670   |
| 13:                    | 693.28   | 60.9841   | 14: | 533.22   | 65.5526   | 15: | 517.79   | 65.9078   |     |          |           |

**Figure S7.** FT-IR spectrum of Pd-V

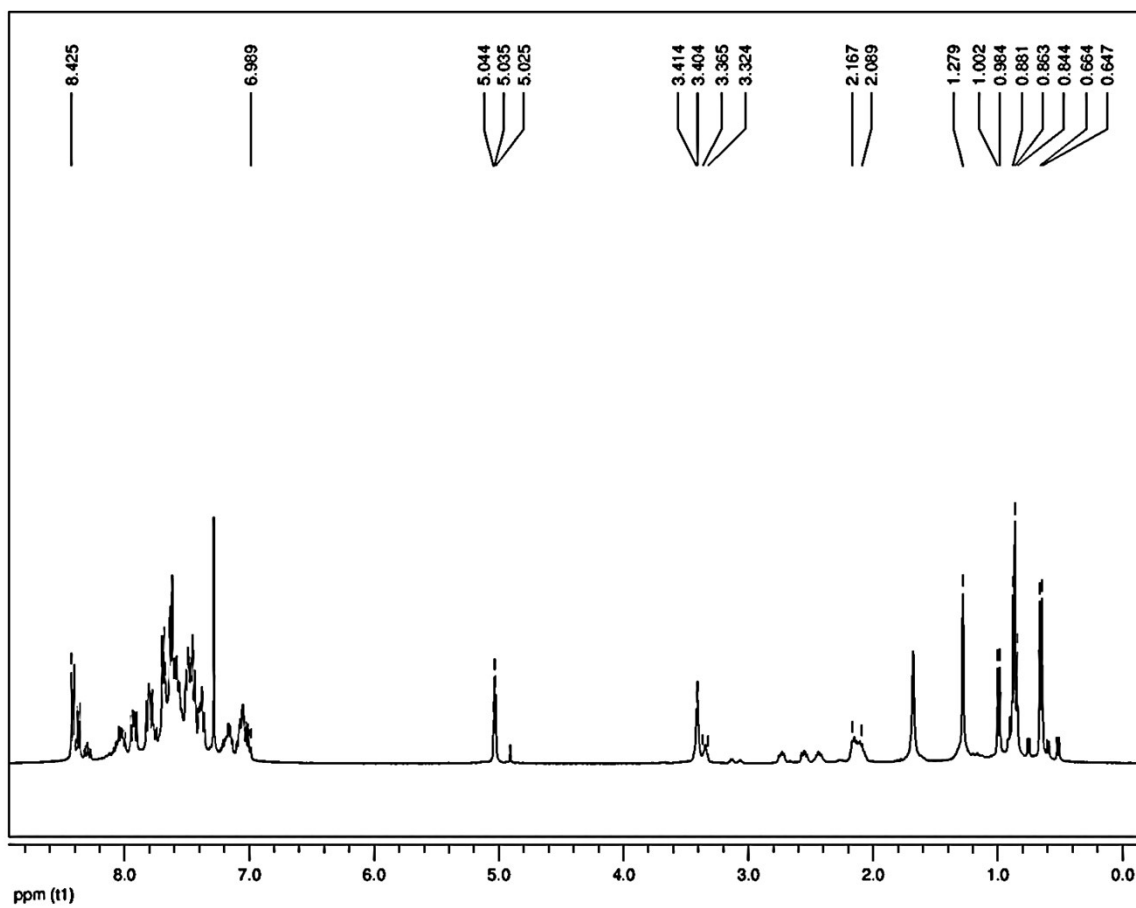

**Figure S8.**  $^1\text{H}$  NMR spectrum of **Pd-V** in  $\text{CDCl}_3$  at room temperature.

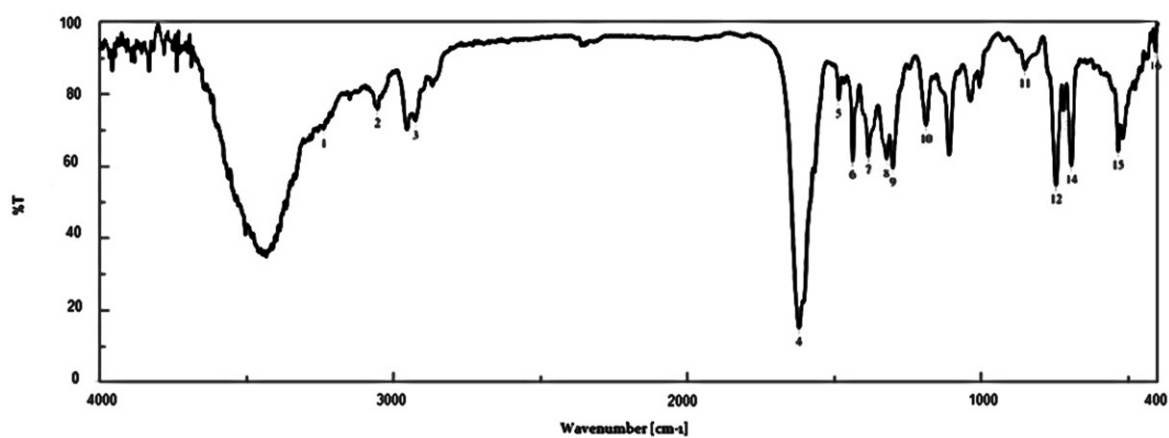

| Result of Peak Picking |          |           |     |          |           |     |          |           |     |          |           |
|------------------------|----------|-----------|-----|----------|-----------|-----|----------|-----------|-----|----------|-----------|
| No.                    | Position | Intensity | No. | Position | Intensity | No. | Position | Intensity | No. | Position | Intensity |
| 1:                     | 3236.93  | 69.2208   | 2:  | 3054.69  | 74.0300   | 3:  | 2925.48  | 72.3635   | 4:  | 1619.91  | 14.6495   |
| 5:                     | 1483.96  | 75.3263   | 6:  | 1436.71  | 59.9066   | 7:  | 1383.68  | 61.5247   | 8:  | 1321.96  | 61.0451   |
| 9:                     | 1300.75  | 60.8150   | 10: | 1187.94  | 69.8372   | 11: | 851.42   | 88.5585   | 12: | 745.35   | 53.4646   |
| 13:                    | 719.32   | 72.6676   | 14: | 693.28   | 59.2243   | 15: | 534.19   | 63.1967   | 16: | 407.87   | 92.9936   |

**Figure S9.** FT-IR spectrum of **Pd-L**

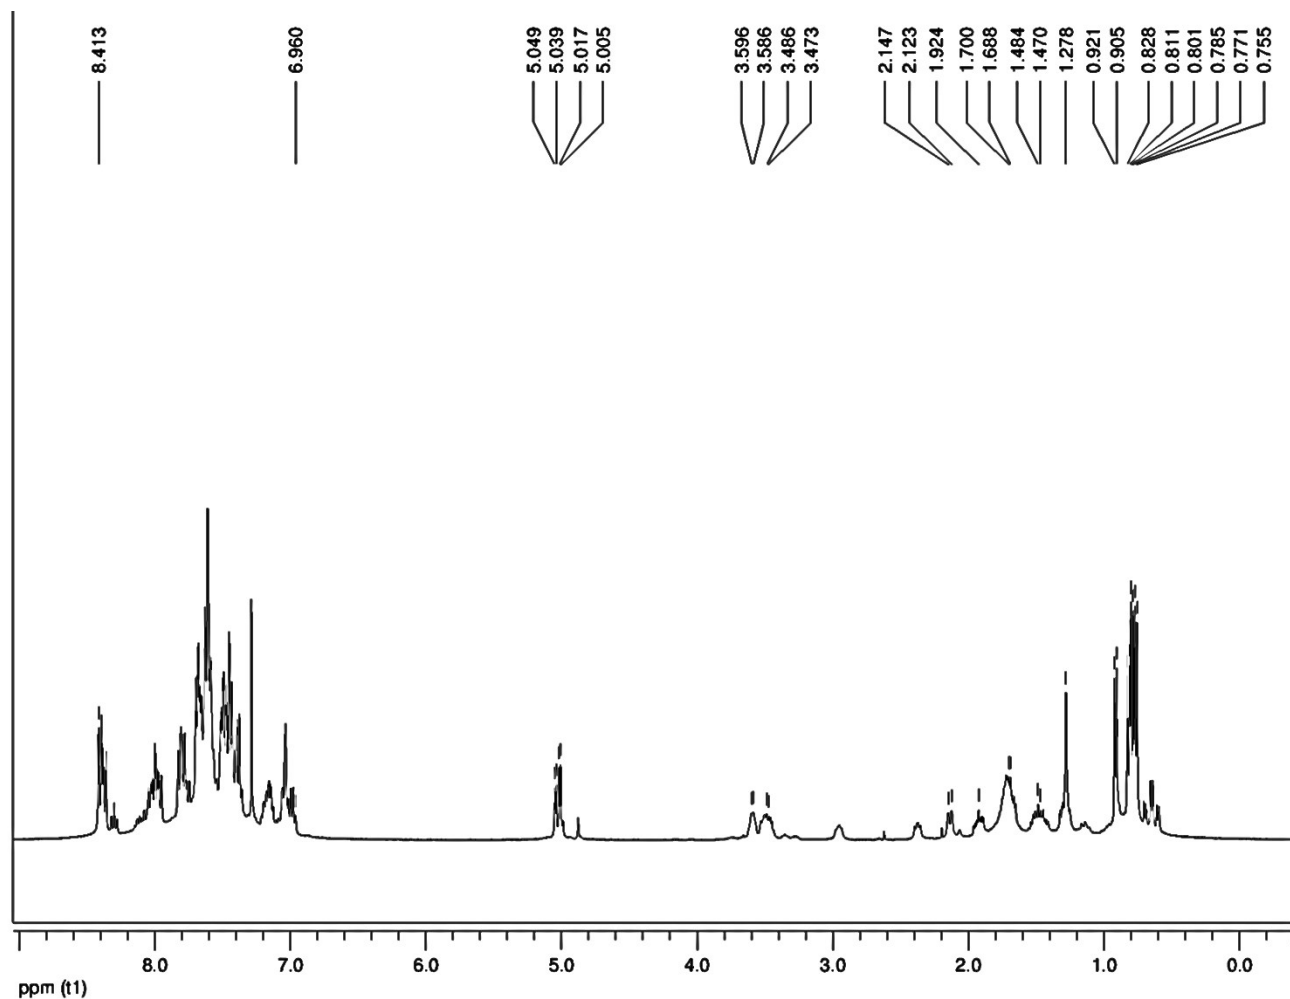

**Figure S10.**  $^1\text{H}$  NMR spectrum of **Pd-L** in  $\text{CDCl}_3$  at room temperature.

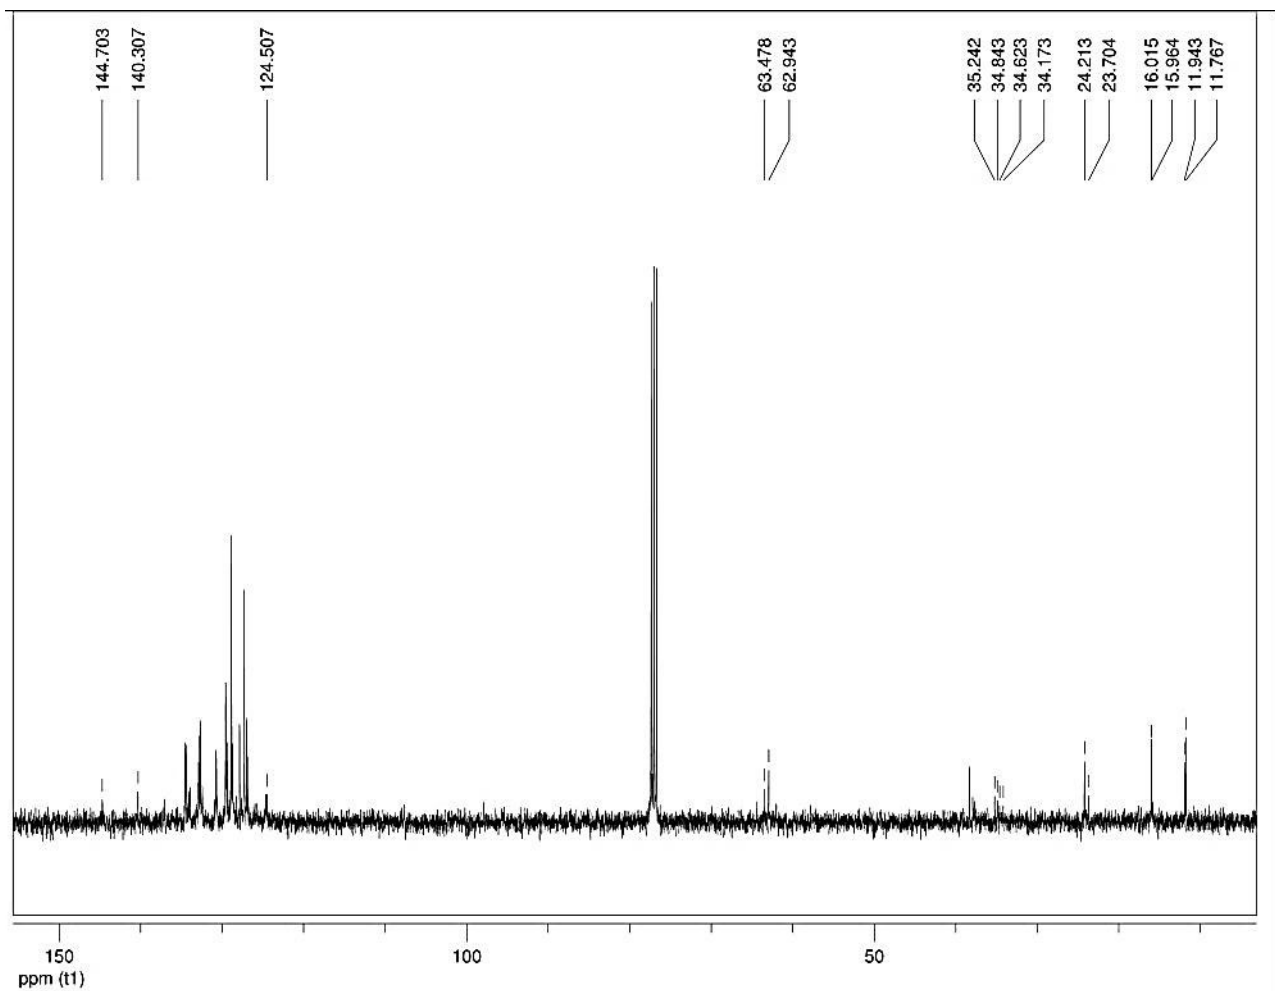

**Figure S11.** <sup>13</sup>C-<sup>1</sup>H NMR spectrum of **Pd-L** in CDCl<sub>3</sub> at room temperature.

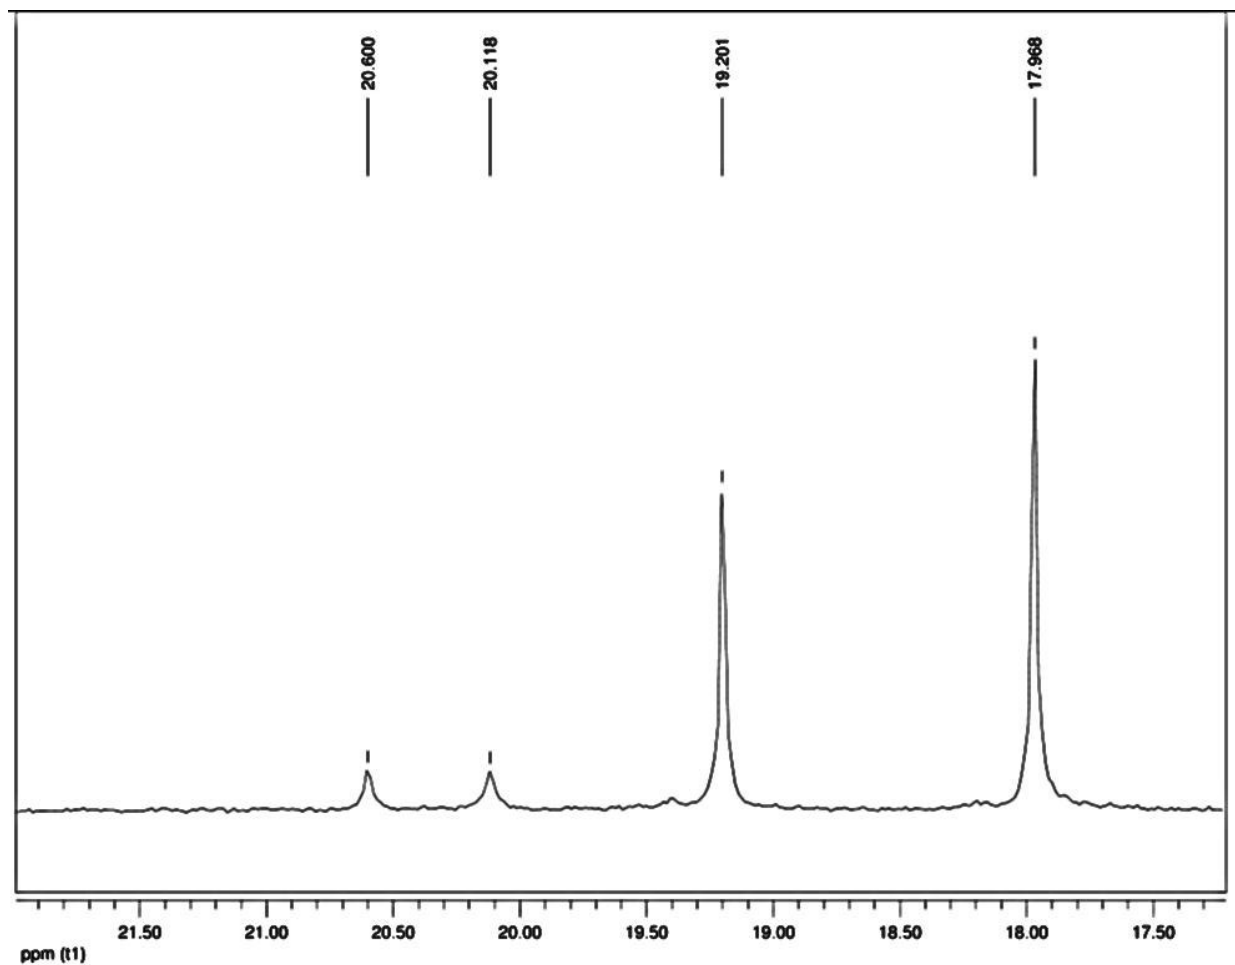

**Figure S12.**  $^{31}\text{P}\{-^1\text{H}\}$  NMR spectrum (expansion) of **Pd-L** in  $\text{CDCl}_3$  at room temperature.

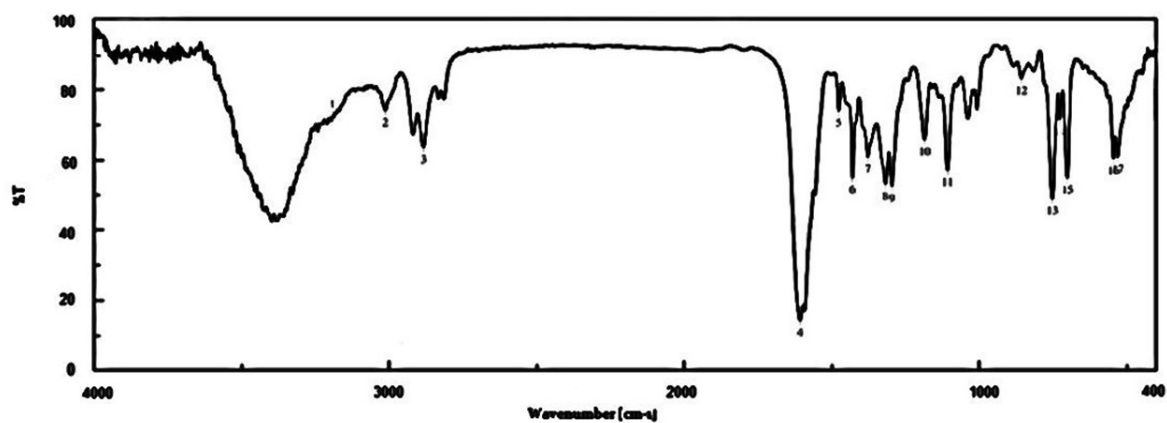

| Result of Peak Picking |          |           |     |          |           |     |          |           |     |          |           |
|------------------------|----------|-----------|-----|----------|-----------|-----|----------|-----------|-----|----------|-----------|
| No.                    | Position | Intensity | No. | Position | Intensity | No. | Position | Intensity | No. | Position | Intensity |
| 1:                     | 3238.86  | 71.4566   | 2:  | 3055.66  | 75.8120   | 3:  | 2923.56  | 64.7972   | 4:  | 1618.95  | 13.5965   |
| 5:                     | 1483.96  | 74.7596   | 6:  | 1436.71  | 54.0159   | 7:  | 1383.68  | 62.9768   | 8:  | 1322.93  | 51.7243   |
| 9:                     | 1300.75  | 51.3200   | 10: | 1187.94  | 67.2505   | 11: | 1107.90  | 59.3889   | 12: | 852.38   | 85.9677   |
| 13:                    | 745.35   | 48.9435   | 14: | 719.32   | 72.9277   | 15: | 693.28   | 53.9626   | 16: | 533.22   | 60.6382   |
| 17:                    | 517.79   | 60.8948   |     |          |           |     |          |           |     |          |           |

Figure S13. FT-IR spectrum of Pd-I

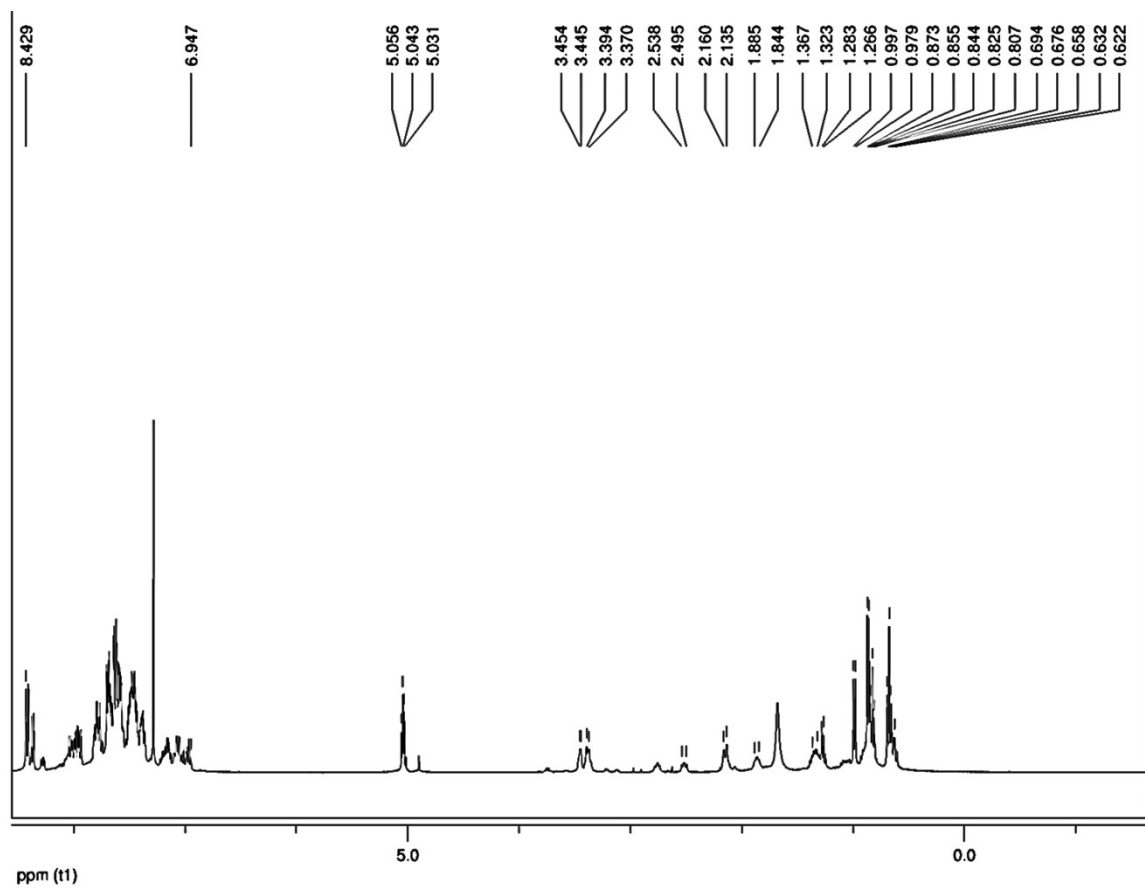

**Figure S14.** <sup>1</sup>H NMR spectrum of **Pd-I** in CDCl<sub>3</sub> at room temperature.



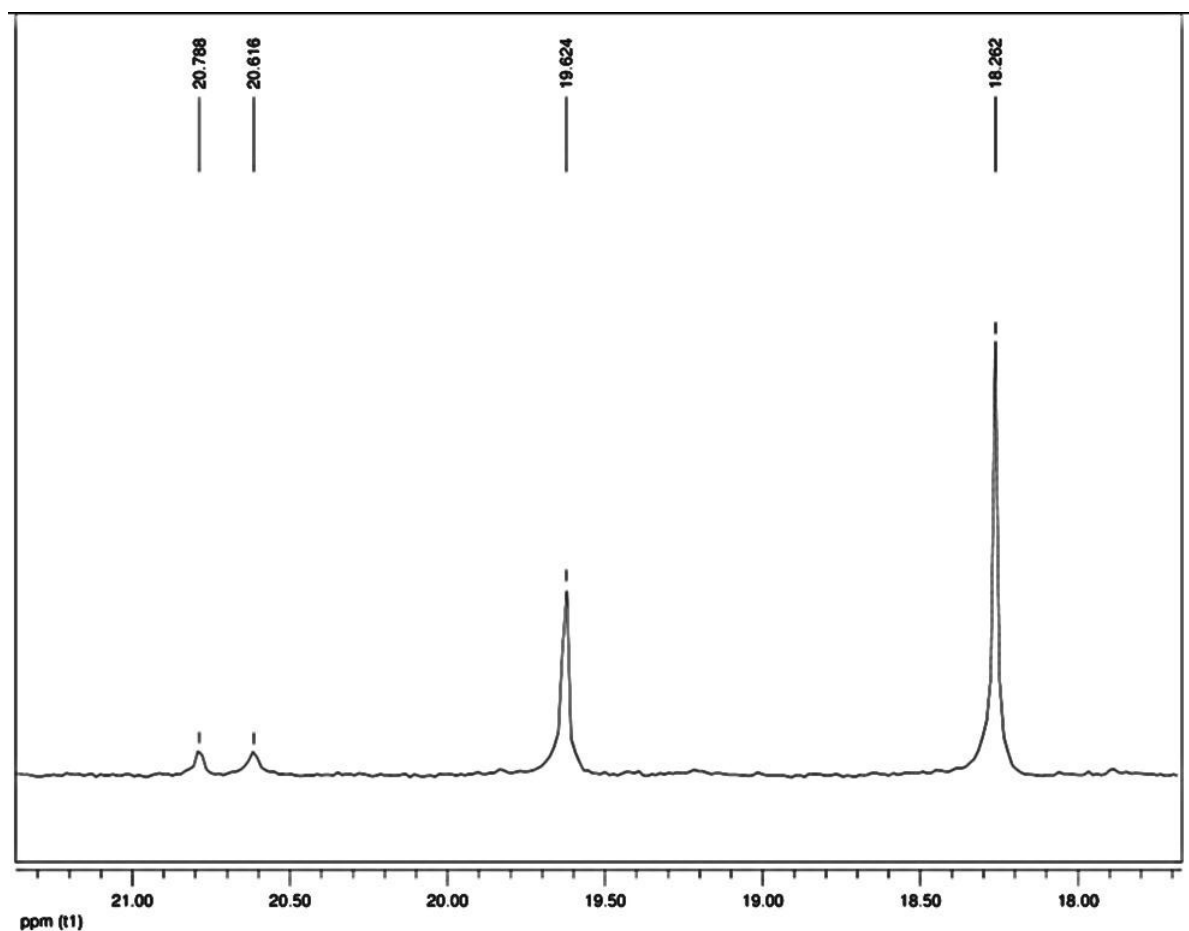

**Figure S15.**  $^{31}\text{P}\{-^1\text{H}\}$  NMR spectrum (expansion) of **Pd-I** in  $\text{CDCl}_3$  at room temperature.

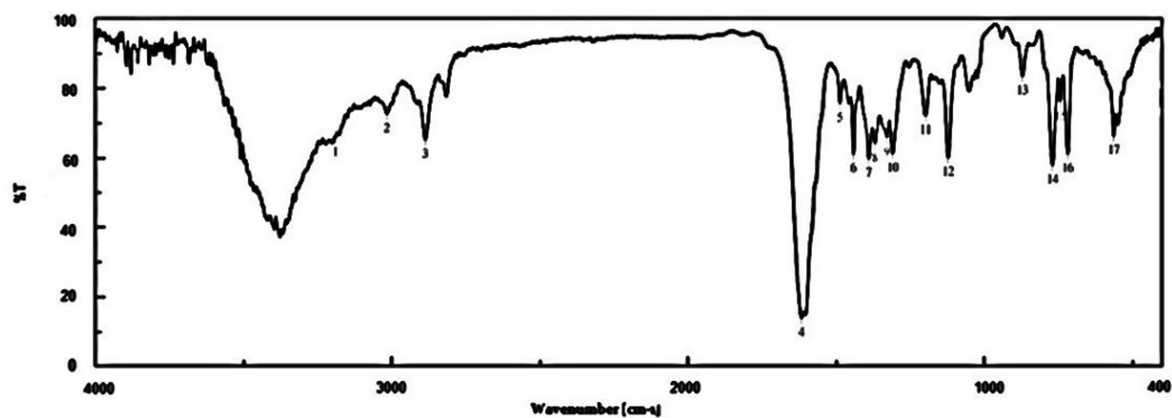

| No. | Position | Intensity |
|-----|----------|-----------|-----|----------|-----------|-----|----------|-----------|-----|----------|-----------|
| 1:  | 3236.93  | 63.8176   | 2:  | 3058.55  | 72.7119   | 3:  | 2924.52  | 63.4432   | 4:  | 1617.02  | 15.6650   |
| 5:  | 1483.96  | 78.5100   | 6:  | 1436.71  | 61.1186   | 7:  | 1383.68  | 60.3101   | 8:  | 1362.46  | 62.7457   |
| 9:  | 1321.96  | 63.8063   | 10: | 1300.75  | 61.1425   | 11: | 1186.97  | 72.4522   | 12: | 1108.87  | 60.4609   |
| 13: | 850.45   | 85.0784   | 14: | 746.32   | 59.2041   | 15: | 719.32   | 78.6663   | 16: | 693.28   | 61.0861   |
| 17: | 533.22   | 64.1202   |     |          |           |     |          |           |     |          |           |

**Figure S16.** FT-IR spectrum of Pd-A

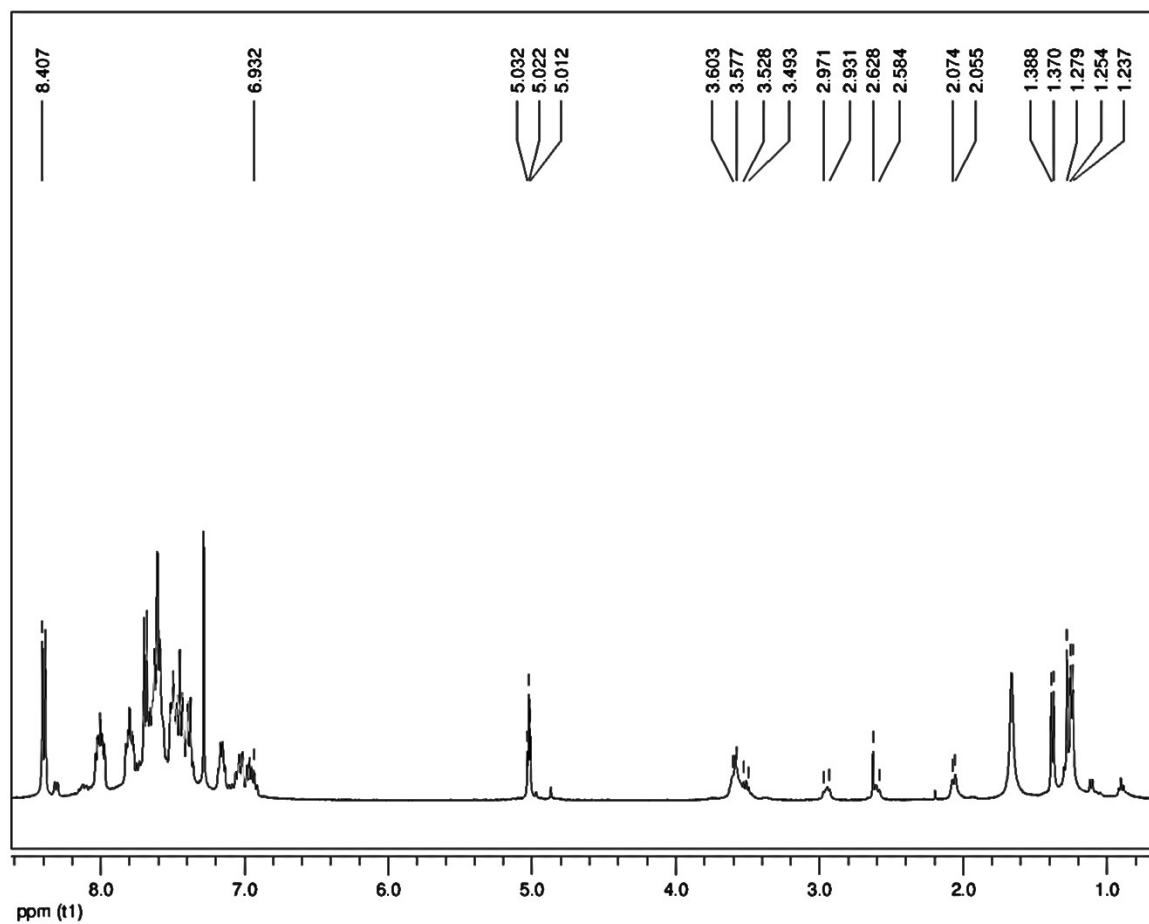

**Figure S17.**  $^1\text{H}$  NMR spectrum of **Pd-A** in  $\text{CDCl}_3$  at room temperature.

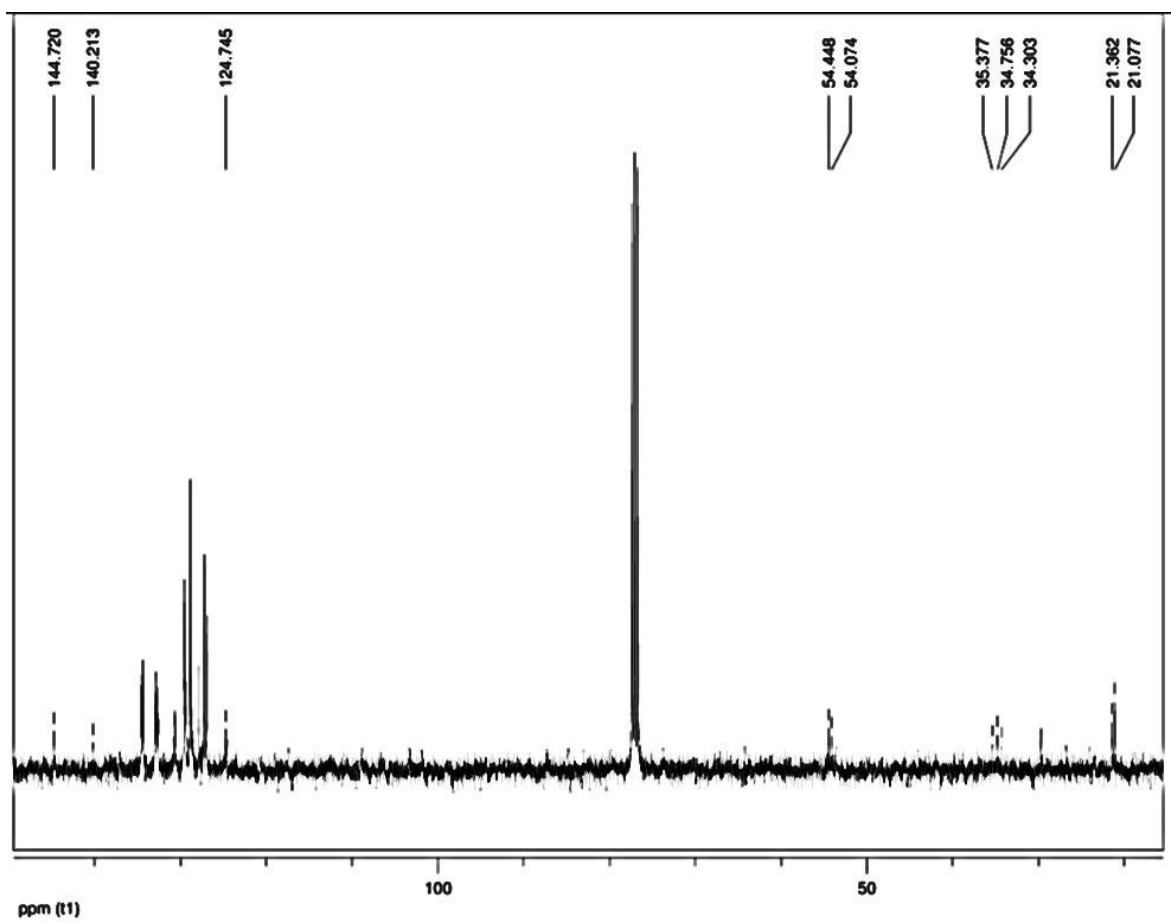

**Figure S18.**  $^{13}\text{C}\{-^1\text{H}\}$  NMR spectrum of **Pd-A** in  $\text{CDCl}_3$  at room temperature.

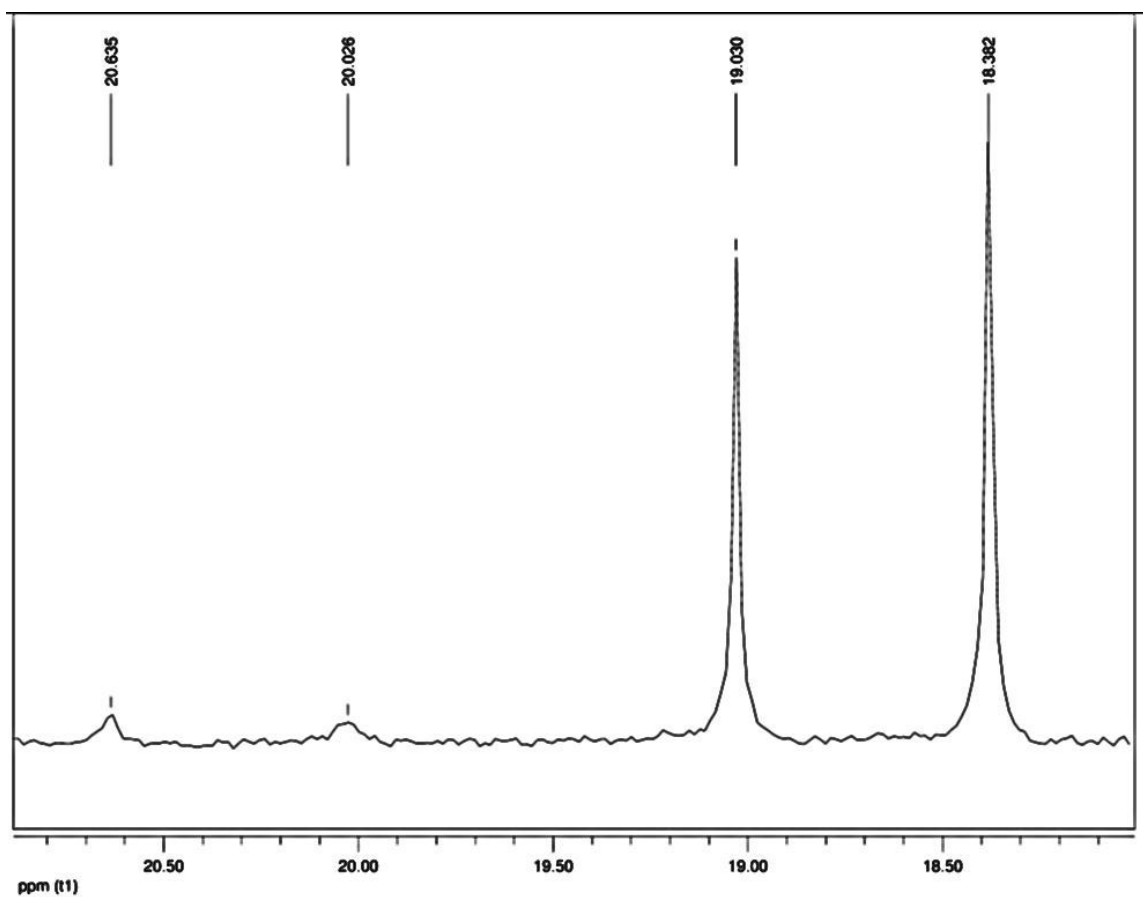

**Figure S19.**  $^{31}\text{P}\{-^1\text{H}\}$  NMR spectrum of **Pd-A** in  $\text{CDCl}_3$  at room temperature.

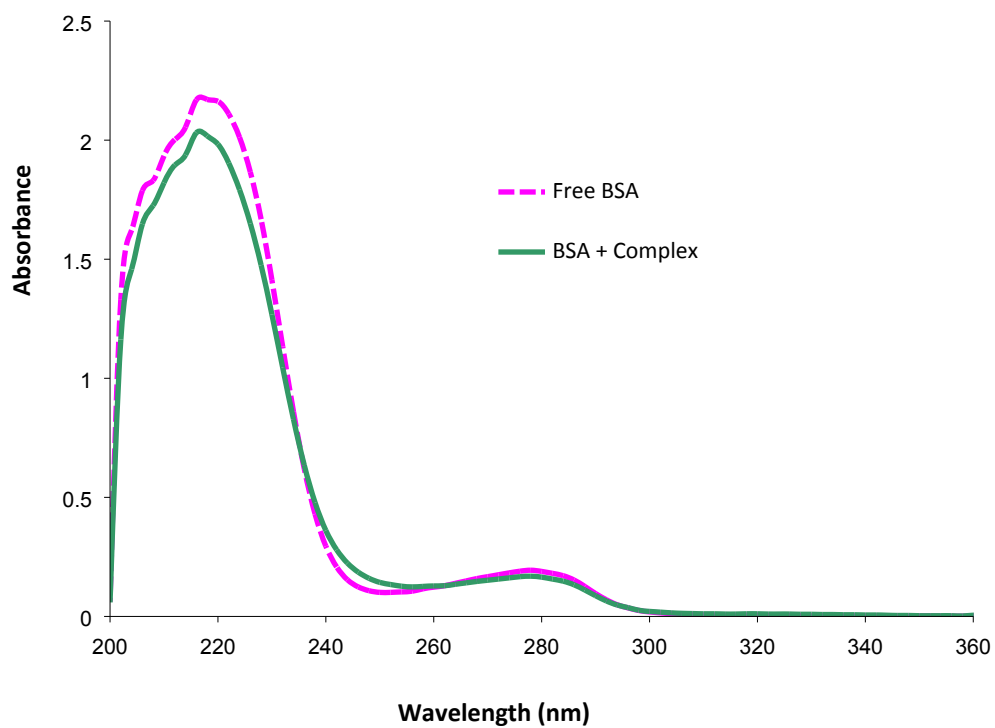

**Figure S20.** UV absorption spectra of  $C(\text{BSA})=2\times 10^{-6}$  M in the absence and presence of **Pd-F**.  $C(\text{complex})=0-6\times 10^{-6}$  M in 5 mM Tris-HCl with 50 Mm NaCl.

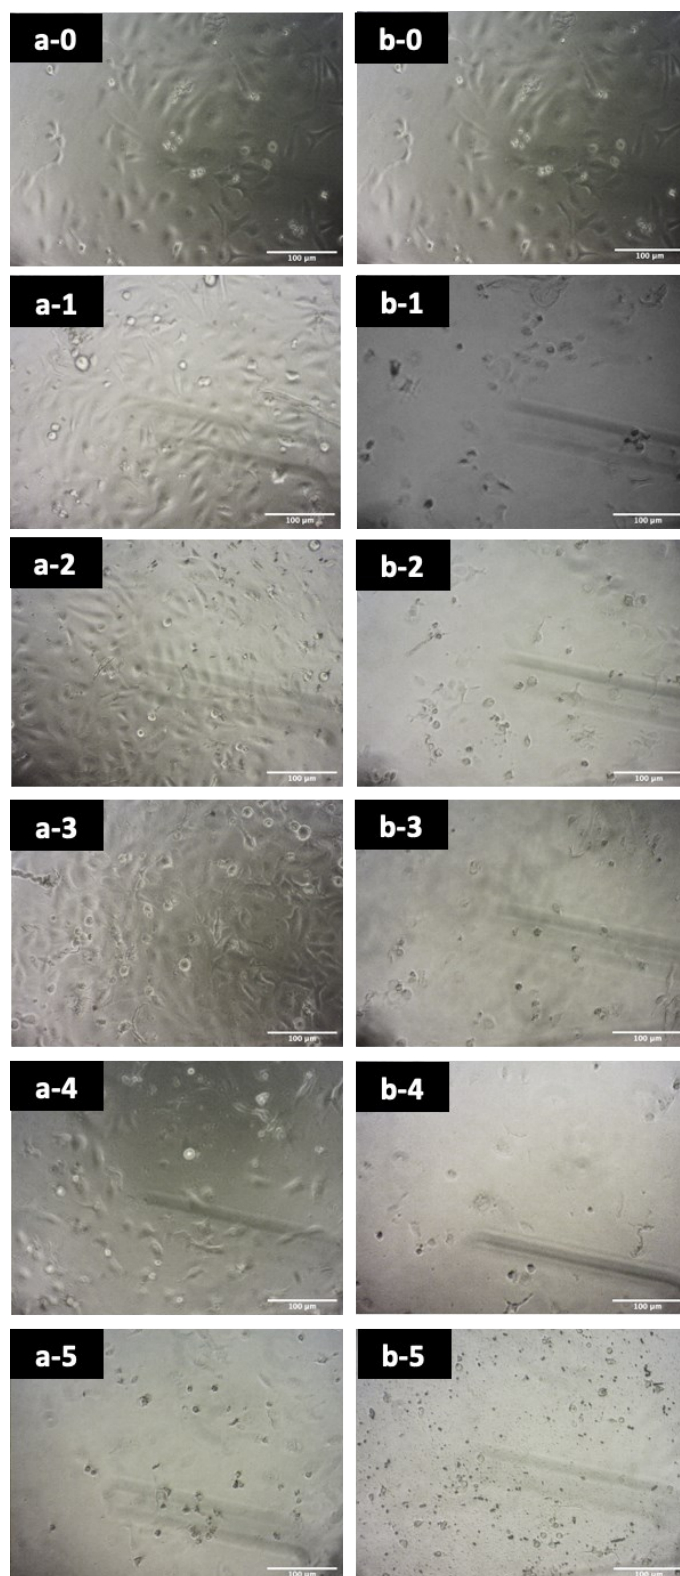

**Figure S21.** Morphological evaluation of **Pd-F** treated normal HUVEC cell, (0: Control, 1: 5  $\mu\text{g/ml}$ , 2: 10  $\mu\text{g/ml}$ , 3: 15  $\mu\text{g/ml}$ , 4: 25  $\mu\text{g/ml}$  and 5: 50  $\mu\text{g/ml}$ ).
